# Supplementary material
Source: PubMed Central journal article supplement (PMC2999913)
Supplement: NIHMS253692-supplement-01.pdf [file NIHMS253692-supplement-01.pdf]

**Supplemental Information**  
Molecular Cell, *Volume 40*

**Regulation of the Histone H4 Monomethylase PR-Set7 by CRL4<sup>Cdt2</sup> Mediated PCNA-Dependent Degradation during DNA Damage**

Hisanobu Oda, Michael R. Hübner, David B. Beck, Michiel Vermeulen, Jerard Hurwitz, David L. Spector, and Danny Reinberg

**SUPPLEMENTAL EXPERIMENTAL PROCEDURES**

**Plasmids**

Plasmids for Flag-Cdt2, Myc-DDB1, Flag-Rbx1, and Myc-Cul4A expression were gifts from Dr. Anindya Dutta. p3xFLAG-p21(WT) and p3xFLAG-p21(PIP) were gifts from Dr. Hideo Nishitani. pET28 bacterial expression plasmids for the PR-Set7 PIP mutants and R265G mutant were generated by site-directed and recombinant PCR mutagenesis. Human PR-Set7 wild-type and mutants were subcloned into pMSCV Puro retroviral vector (Invitrogen), pEYFP-C1 vector (Clontech, or a vector in which the EYFP moiety has been replaced by mCherry (Shaner *et al.*, 2004)), and p3xFLAG-Myc-CMV-26 vector (Sigma). The siRNA resistant mutation within PR-Set7 was generated by site directed mutagenesis. 53BP1-mCherry plasmid was a gift from Titia de Lange. pMT123 HA-Ub was a gift from Tony Huang. 3xFLAG-tagged PR-Set7 was cloned as an XhoI/BamHI fragment into the pMSCV TtIGPP vector (S. Lowe laboratory, CSHL). iTetONGR\* (Anastassiadis *et al.*, 2002) was cloned as an EcoRI/BamHI fragment into pMSCV MB (M. Huebner, CSHL). Retrovirus was produced in 293-GPG cells according to standard methods and used to infect MEFs.

**Antibodies and Reagents**

An anti-PR-Set7 polyclonal antibody was generated in rabbit. The sources for the following reagents are as follows: FLAG M2 antibody (Sigma), DDB1 antibody (34-2300, Invitrogen), Cdt2 antibody (A300-948A-1, Bethyl), beta-Tubulin (ab6046, Abcam), PCNA (PC10) (sc-56, Santa-Cruz), phospho serine 317 Chk-1 (2344, Cell signaling), phospho-H3S10 (06570, Millipore), phospho-Tyrosine 15 Cdk1 (sc12340, Santa-Cruz), ubiquitin E1 inhibitor UBEI-41 (Biogenova), MMS (Sigma), hydrogen peroxide (Sigma), Adriamycin (Sigma), Hydroxyurea (Sigma), and MG132 (Sigma).

### **Gene Silencing by siRNA**

The siRNA transfections were performed using RNAiMAX (Invitrogen) according to the manufacturer's specifications. The nucleotide sequences of siRNA are given in Supplemental Experimental Procedures. si-oligos for PR-Set7 and si-AllStars as a negative control were purchased from Qiagen. si-oligos for Cdt2 and DDB1 were obtained from Invitrogen.

### **In Vivo and In Vitro Ubiquitylation Assay**

The in vivo experiment was performed in 293T cells transfected with pMT123 HA-Ub for 48 hr and treated with 10 uM MG132 for 4 hr. Cell lysate was prepared as described previously, and immunoprecipitated for endogenous PR-Set7 (Abbas et al., 2008). The in vitro assay was done as described previously (Abbas et al., 2008). Briefly, each component of the Cul4/Cdt2 complex was transiently expressed in 293T cells and affinity purified with anti-FLAG antibody. Purified complex was mixed with recombinant PR-Set7 in ubiquitylation buffer. The reactions were incubated at 30 °C for 1 hr and analyzed by SDS-PAGE and western blotting. UBCH5c was purchased from BostonBiochem.

### **Protein Interaction Assay and In Vitro DNA Synthesis**

Bacterially expressed Flag-His tagged PR-Set7 WT and mutant proteins were affinity-purified with Ni-NTA agarose (Qiagen) and FLAG M2 agarose resin (Sigma). Purification of HA-tagged PCNA and in vitro DNA polymerization assay were as described (Gibbs et al., 1997).

### **siRNA Oligos**

PR-Set7-7 (target sequence: CTGCAGTCTGAAgAAAGGAAA)

PR-Set7-8 (sense: CCUGUUGAUUGCCAAAACTTdTdT, antisense:  
GUUUUUGGCAAUCAACAGGdTdT)

Cdt2-1 (sense: GAAUUAUACUGCUUAUCGAdTdT, antisense:  
UCGAUAAGCAGUAUAAUUCdTdT)

DDB1-1 (sense: ACAGAGUGGCGAGAGCAUUDdTdT, antisense:  
AAUGCUCUCGCCACUCUGUDdTdT)

DDB1-2 (sense: CCUGUUGAUUGCCAAAACTTdTdT, antisense:  
GUUUUUGGCAAUCAACAGGdTdT)

### Figure S1. UV-Mediated Degradation of PR-Set7 Occurs at Low Dosages

The protein levels of PR-Set7 decrease as a function of HeLa cell exposure to increased dosages of UV irradiation (100-400 J/m<sup>2</sup>), as shown by western blotting. PCNA serves as a loading control.

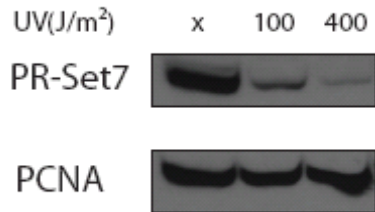

### Supplemental References

Anastassiadis, K., Kim, J., Daigle, N., Sprengel, R., Schöler, H.R., and Stewart, A.F. (2002). A predictable ligand regulated expression strategy for stably integrated transgenes in mammalian cells in culture. *Gene* 298, 159–172.
